# Supplementary material for: Chronic ethanol consumption compromises neutrophil function in acute pulmonary Aspergillus fumigatus infection
Source: eLife. 2020 Jul 23;9:e58855. doi: 10.7554/eLife.58855 (PMC7398701; doi:10.7554/eLife.58855)
Supplement: Figure 1—source data 1. [file elife-58855-fig1-data1.xlsx]

## Sheet: Planilha1
Chronic ethanol consumption compromises neutrophil function in acute pulmonary Aspergillus fumigatus infection
Figure 1-source data 1
Blood cells counting before infection
Mononuclear cells x10^6
NI control	NI Ethanol-treated
1.376	0.81
0.828	0.87
1.032	0.968
0.696	0.64
0.616	0.588
0.492
Polimorfonuclear cells x10^6
NI control	NI Ethanol-treated
2.24	0.9
0.72	1.3
1.68	1.32
1.04	1.6
0.84	1.12
1.08
Myelogram analysis
Sample	Neutrophil precursor
	myelocytes		Metamyelocytes		promyelocytes
	#	%	#	%	#	%
Control 1	0	0	2	1	0	0		#	absolute number
Control 2	0	0	3	1.5	2	1		%	relative number
Control 3	0	0	2	1	0	0
Ethanol treated 1	0	0	4	2	0	0
Ethanol treated 2	0	0	0	0	2	1
Ethanol treated 3	0	0	1	0.5	0	0
Inflammatory mediators in serum before infection
TNF-a in serum
NI control	NI Ethanol-treated
120.349	107.168
133.53	115.955
115.955	91.791
85.2	304.878
122.546	124.742
120.349
IL-1b in serum
NI control	NI Ethanol-treated
34.933	34.725
42.592	49.158
30.556	43.686
28.367	42.592
40.404	23.99
41.498	44.477
43.686	34.933
29.461	59.006
38.472	34.933
CXCL1 in serum
NI control	NI Ethanol-treated
812.452	2963.04
766.368	1102.12
263.834	3149.57
323.084	1576.13
	2129.14
	985.815
