# Supplementary material for: Chronic ethanol consumption compromises neutrophil function in acute pulmonary Aspergillus fumigatus infection
Source: eLife. 2020 Jul 23;9:e58855. doi: 10.7554/eLife.58855 (PMC7398701; doi:10.7554/eLife.58855)
Supplement: Figure 3—source data 1. [file elife-58855-fig3-data1.xlsx]

## Sheet: Planilha1
Chronic ethanol consumption compromises neutrophil function in acute pulmonary Aspergillus fumigatus infection
Figure 3-source data 1
Inflammatory mediators in BALF after infection
CXCL1
NI Control	NI Ethanol treated	Control infected 24 h	Ethanol treated infected 24 h	Control infected 48 h	Ethanol treated infected 48 h
17.4366	25.8873	1631.52	1487.86	113.211	0
0	0	1727.3	2276.59	8.98592	25.8873
3.35211	8.98592	1634.34	1676.59	3.35211	0
0	20.2535	1949.83	949.831	23.0704	0
0	0	1228.7	2592.08
39.9718	0
CXCL2
NI Control	NI Ethanol treated	Control infected 24 h	Ethanol treated infected 24 h	Control infected 48 h	Ethanol treated infected 48 h
9.74123	0	560.009	1341.39	196.832	20.7466
9.74123	20.7466	317.891	1033.24	912.18	97.7841
20.7466	9.74123	736.095	1044.24	1033.24	20.7466
		780.116	1110.28		747.1
		769.111			449.955
IL-17
NI Control	NI Ethanol treated	Control infected 24 h	Ethanol treated infected 24 h	Control infected 48 h	Ethanol treated infected 48 h
15.8333	6.317	24.1667	5.83333	30.8333	59.1667
15.8333	23.947	38.051	22.184	2.5	12.5
6.317	6.317	16.895	32.762	6.317	16.895
16.895	4.554	22.184	4.554	53.918	25.71
2.791	6.317	16.895	38.051	20.421	29.236
4.554	15.3977	70.0861	2.1082	4.554	22.184
8.08	0.0679332	36.1618	3.12876	7.21385	33.8788
10.2807	6.19215	22.1612	1.08793
4.14961	18.4714	52.9626	6.19215
10.2807	3.49363		40.8287
9.0939	8.16052
TNF-a
NI Control	NI Ethanol treated	Control infected 24 h	Ethanol treated infected 24 h	Control infected 48 h	Ethanol treated infected 48 h
0	0	1890.91	1025.11	657.143	267.533
0	0	1293.51	1752.38	258.875	261.164
0	0	2215.58	1133.33	432.679	286.574
0	0	978.986	1220.38	218.815
0	0	1252.14	1440.59	464.441
0	0	1421.54	942.989
15.5382		1466	1118.74
53.6527		1540.12	1146.27
			1580.35
IL-1b
NI Control	NI Ethanol treated	Control infected 24 h	Ethanol treated infected 24 h	Control infected 48 h	Ethanol treated infected 48 h
14.4654	6.60377	431.132	305.346	39.6226	1.88679
0.314465	14.4654	461.006	299.057	20.7547	8.1761
20.7547	0	473.585	476.73	23.8994	38.0503
67.9245	9.74843	578.931	237.736
38.0503	0	366.667	478.302
25.4717		448.428
IL-10
NI Control	NI Ethanol treated	Control infected 24 h	Ethanol treated infected 24 h	Control infected 48 h	Ethanol treated infected 48 h
0	0	58.2971	36.558	0	58.2971
11.1957	0	29.3116	29.3116	116.268	40.1812
54.6739	0.326087	29.3116	47.4275	76.413	7.57246
47.4275	76.413	40.1812	0
69.1667	7.57246	18.442	0
