# Supplementary material for: Chronic ethanol consumption compromises neutrophil function in acute pulmonary Aspergillus fumigatus infection
Source: eLife. 2020 Jul 23;9:e58855. doi: 10.7554/eLife.58855 (PMC7398701; doi:10.7554/eLife.58855)
Supplement: Figure 4—source data 1. [file elife-58855-fig4-data1.xlsx]

## Sheet: Planilha1
Chronic ethanol consumption compromises neutrophil function in acute pulmonary Aspergillus fumigatus infection
Figure 4-source data 1
MPO
NI Control	NI Ethanol treated	Control infected 24 h	Ethanol treated infected 24 h
520.227	340.227	2691.14	1420.23
444.545	259.773	1512.27	1096.36
243.409	229.773	2004.55	1084.09
594.545	407.045	2818.64	975
349.091	122.727		1412.73
385.909	486.818
	500.455
NAG
NI Control	NI Ethanol treated	Control infected 24 h	Ethanol treated infected 24 h	Control infected 48 h	Ethanol treated infected 48 h
0.688729	0.729017	3.47194	3.14964	2.90216	3.4705
0.621583	0.663789	2.75684	2.67338	2.84029	4.10791
1.29	1.32	3.27338	3.71799	2.50791	2.23165
1.35	0.69	3.15252	2.8259	2.26331	4.08921
0.79	0.76	2.92086	3.10648	2.48921	2.50791
2.2518	1.70935	2.7036	2.95252	2.95108
1.79425	2.42158	2.89209
EPO
0.374667	0.767667	2.92067	2.81067	1.347	1.545
0.417667	0.626	2.33467	2.84833	2.097	1.786
0.832	0.530667	2.52967	1.858	1.768	1.42267
0.664667	0.276667	2.962	2.9875	1.5015	0.967333
0.404	0.796333	2.70267	1.79567	0.873	1.0065
0.4125	0.331	2.31467	3.0505		1.953
0.646667	0.365333
CD3+CD4+ cells BALF x10^3
NI Control	NI Ethanol treated	Control infected 24 h	Ethanol treated infected 24 h
0.908	1.076	5.148	5.058
0.768	0.884	13.5	4.374
1.248	0.64	7.002	5.292
1.548	0.716	12.384	6.408
	1.216	5.292	5.994
		11.07
CD3+CD4+IL-17+ cells in BALF x10^3
NI Control	NI Ethanol treated	Control infected 24 h	Ethanol treated infected 24 h
0.041	0	1.287	0
0	0	0	0
0.205	0	0	0
0.083	0	3.381	0
0.129	0.058	2.117	1.205
		1.384	0
