# Supplementary material for: Chronic ethanol consumption compromises neutrophil function in acute pulmonary Aspergillus fumigatus infection
Source: eLife. 2020 Jul 23;9:e58855. doi: 10.7554/eLife.58855 (PMC7398701; doi:10.7554/eLife.58855)
Supplement: Figure 6—source data 1. [file elife-58855-fig6-data1.xlsx]

## Sheet: Planilha1
Chronic ethanol consumption compromises neutrophil function in acute pulmonary Aspergillus fumigatus infection
Figure 6-source data 1
Control + RPMI	Ethanol treated + RPMI	Control + MIP2	Ethanol treated + MIP2
2.2	3.2	12.4	9.2
3.2	1.6	9.4	3
2	2.8	7.4	5.4
1		9.4	6.4
			5.6
