# Supplementary material for: Chronic ethanol consumption compromises neutrophil function in acute pulmonary Aspergillus fumigatus infection
Source: eLife. 2020 Jul 23;9:e58855. doi: 10.7554/eLife.58855 (PMC7398701; doi:10.7554/eLife.58855)
Supplement: Figure 7—source data 1. [file elife-58855-fig7-data1.xlsx]

## Sheet: Planilha1
Chronic ethanol consumption compromises neutrophil function in acute pulmonary Aspergillus fumigatus infection
Figure 7-source data 1
Flow cytometry data
CD62L MFI
NI control	NI Ethanol-treated	Infected control	Infected ethanol-treated
202	109	62.1	139
229	235	43.3	146
161	106	10.4	143
	170	34.3	137
CD11b MFI
NI control	NI Ethanol-treated	Infected control	Infected ethanol-treated
422	375	433	302
359	322	632	334
487	316	723	396
257		667
CXCL1
		Infected control	Infected ethanol-treated
		314.307	364.779
		263.834	487.67
		169.471	650.061
		176.055
CXCR2 MFI
2480	2480	3134	4255
2690	2943	3652	2943
2308	3460	5695	4708
4826	2666	10328	3629
7904	10107	6306	5107
8838	4481	10619	5336
5978	6498	9299	2721
10114	9604	10500	3158
